# Supplementary material for: Exploring plasmonic coupling in hole-cap arrays
Source: publisher site journal article supplement (doi:10.3762/bjnano.6.1), 2015-01-02
Supplement: Additional file 1 [file 2190-4286-6-1-S1.pdf]

# Supporting Information

for

## Exploring plasmonic coupling in hole-cap arrays

Thomas M. Schmidt<sup>1</sup>, Maj Frederiksen<sup>1</sup>, Vladimir Bochenkov<sup>1,2</sup> and Duncan S. Sutherland<sup>\*1,§</sup>

Address: <sup>1</sup>Interdisciplinary Nanoscience Center (iNANO), Aarhus University, Gustav Wieds Vej 14, 8000 Aarhus, Denmark and <sup>2</sup>Department of Chemistry, Lomonosov Moscow State University, Moscow, Russian Federation

Email: Duncan S. Sutherland - duncan@inano.au.dk

\* Corresponding author

§ Tel: +45 23 38 57 89

## AFM measurements of the height from the gold film surface to the gold cap on the top the PS particle

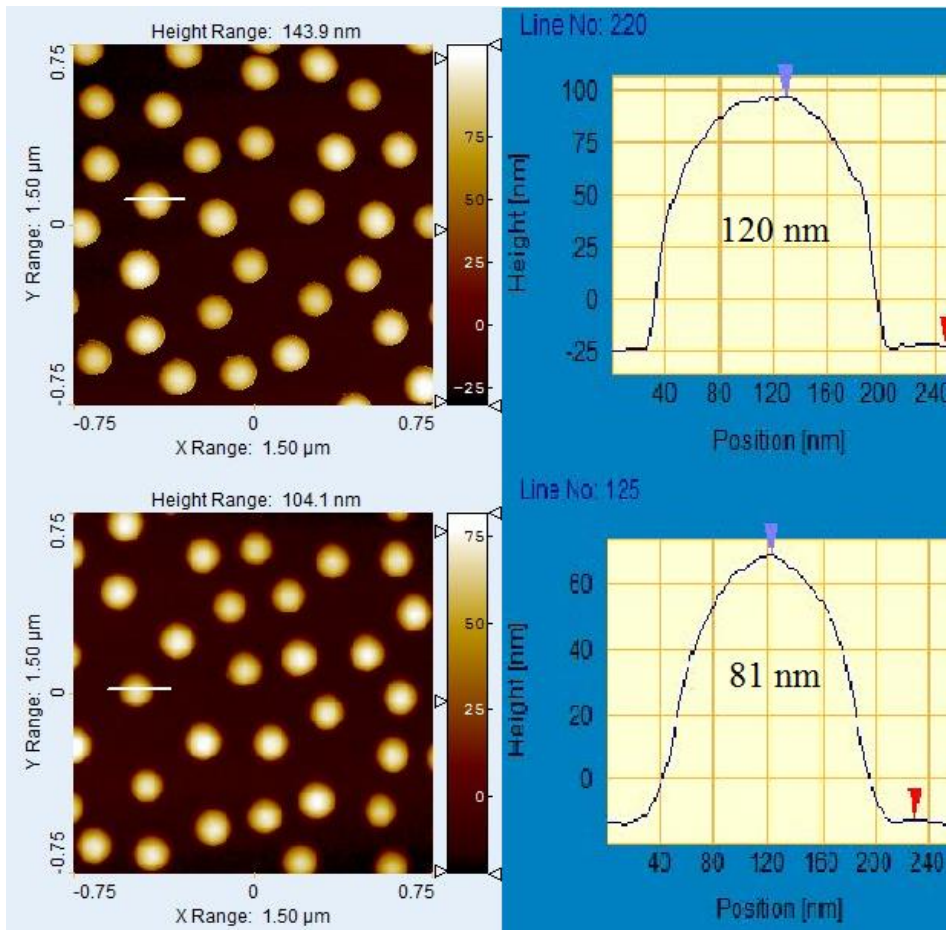

**Figure S1:** AFM measurements of the height from the gold film surface to the gold cap on the top the PS particle (To the right a single line scan is shown). Upper picture: No heating. Lower picture: Heated to 125 °C.
